# Supplementary material
Source: Research Square preprint supplement (doi:10.21203/rs.3.rs-9428414/v2)
Supplement: Supplementary file 1 [file f830192af3424c4903ce75d6.docx]

**Ethical Statement**

This study is based on secondary analysis of publicly available, aggregated, and de-identified data. No human participants, human specimens, or animal experiments were involved in this research. Therefore, ethical approval and informed consent were not required for this study.
